# Supplementary material
Source: PubMed Central journal article supplement (PMC1855038)

Chu et al, Rad3p and Cds1p Modulate MCB- and FKH-genes  
Supplemental Figure 1

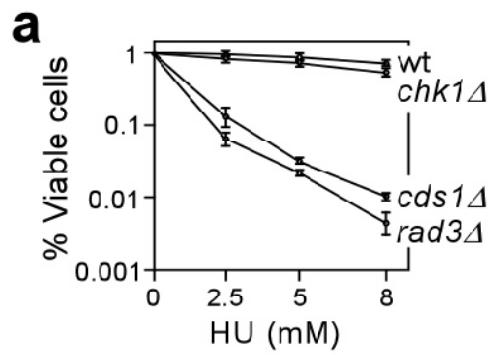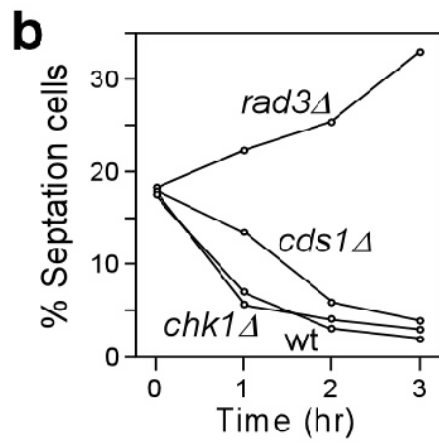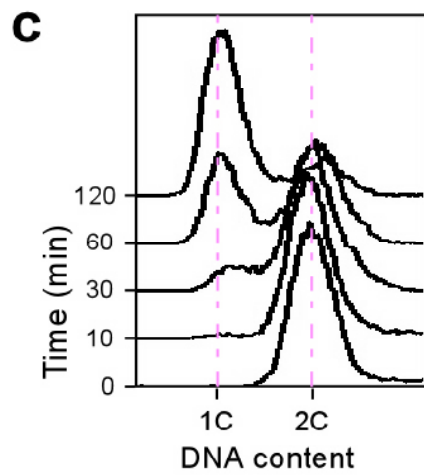

Chu et al, Rad3p and Cds1p Modulate MCB- and FKH-genes  
 Supplemental Figure 2a

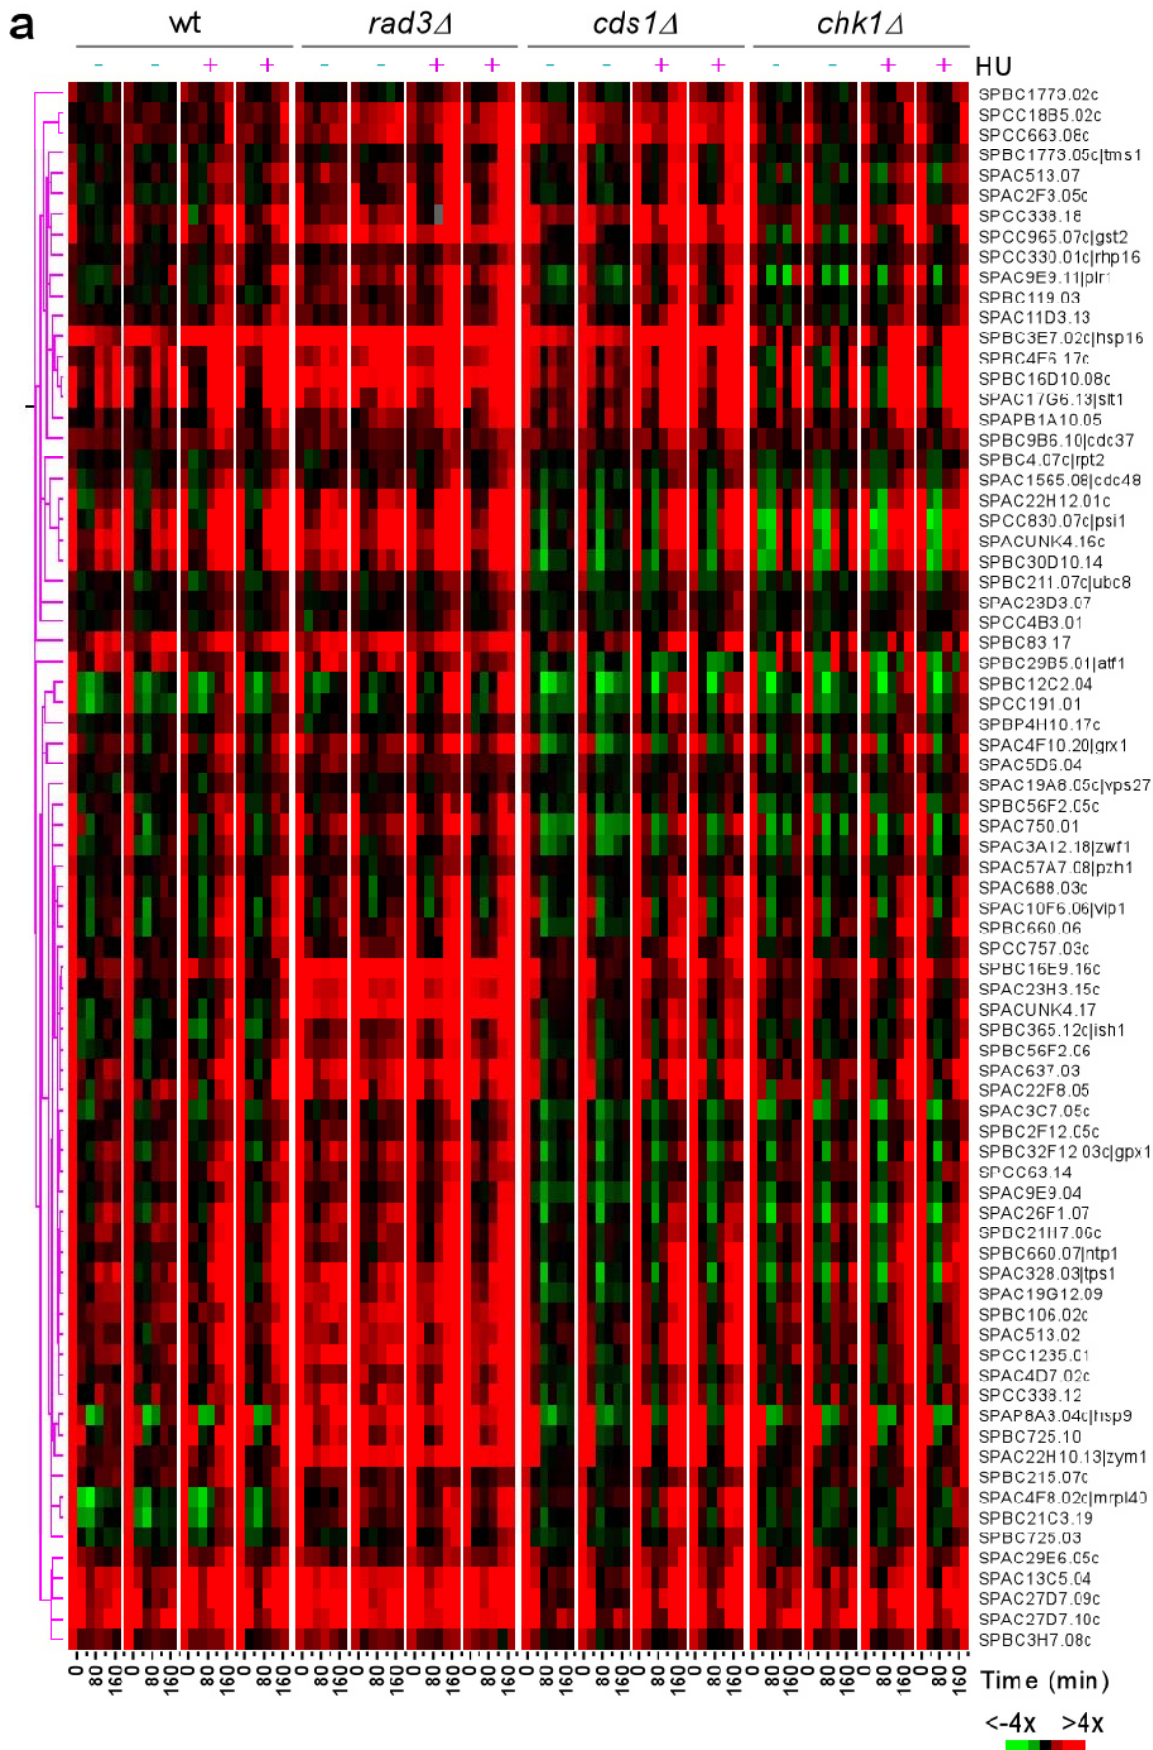

Chu et al, Rad3p and Cds1p Modulate MCB- and FKH-genes  
 Supplemental Figure 2b

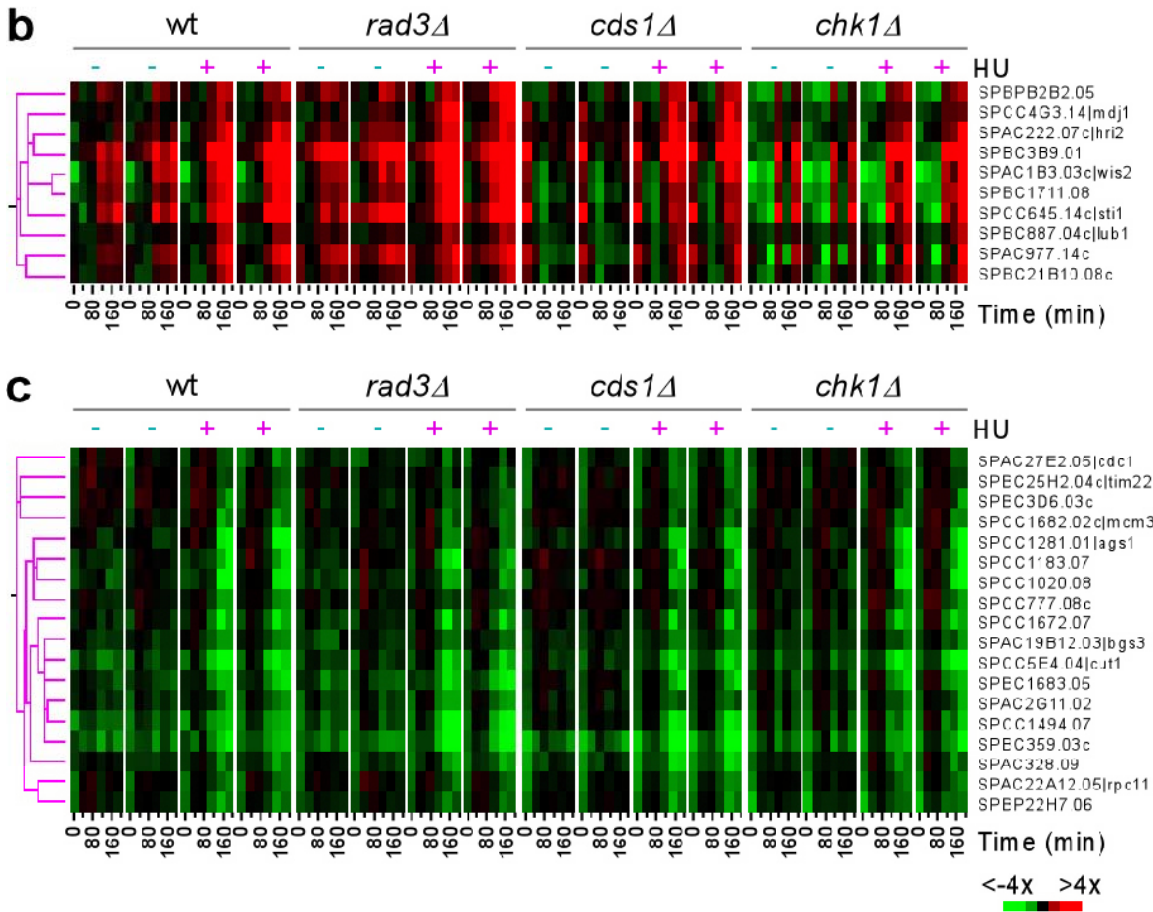

Chu et al, Rad3p and Cds1p Modulate MCB- and FKH-genes  
Supplemental Figure 3

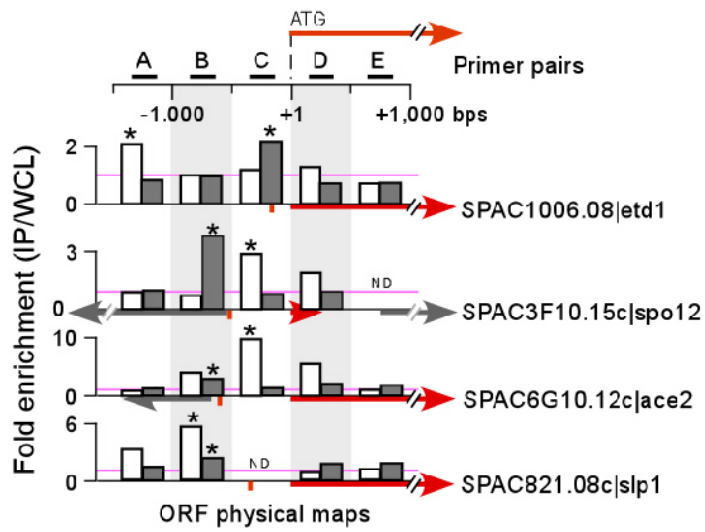

Supplement: mbc_E06-10-0928_1.pdf [file mbc_E06-10-0928_1.pdf]
